# Supplementary material
Source: Springer Nature journal article supplement (https://www.springerprofessional.de/resource/supplementary/13173_2013_3_MOESM8_ESM.pdf/11897022)

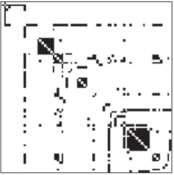**a**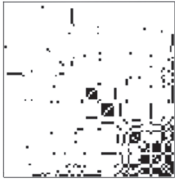**b**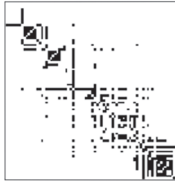**c**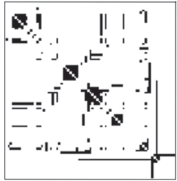**d**

Supplement: MOESM8 [file 11897022]
